# Supplementary material
Source: PubMed Central journal article supplement (PMC6445699)
Supplement: NIHMS1519472-supplement-2.pdf [file NIHMS1519472-supplement-2.pdf]

## Supplementary Tables

### Supplementary Table 1

| Antibodies and Fluorochrome Used for Multiplex Immunofluorescence |                      |                      |                                   |          |                                                       |                                              |                                |
|-------------------------------------------------------------------|----------------------|----------------------|-----------------------------------|----------|-------------------------------------------------------|----------------------------------------------|--------------------------------|
| Primary antibodies                                                | Clone or reference # | Provider             | Order of serially stained markers | Dilution | Link (dilution, incubation time, ref #, company)      | Secondary (tertiary) HRP-conjugated antibody | Tyramide conjugated fluochrome |
| Goat anti-TIM-3                                                   | AF2365               | R&D systems          | 1                                 | 1/10000  | rabbit-anti-goat (1/1500, 30 minutes, E0466, Agilent) | Rabbit-<br>envisio                           | Opal 540                       |
| Mouse anti-LAG-3                                                  | 17B4                 | LifeSpan Biosciences | 2                                 | 1/10000  | none                                                  | Mouse-<br>envisio                            | Opal 620                       |
| Mouse anti-PD-1                                                   | EH33                 | Dr. Gordon Freeman   | 3                                 | 1/5000   | none                                                  | Mouse-<br>envisio                            | Opal 690                       |
| Mouse anti-CD8                                                    | C8/144B              | Agilent              | 4                                 | 1/10000  | none                                                  | Mouse-<br>envisio                            | Opal 520                       |

Abbreviations: CD8, cluster of differentiation 8; LAG-3, lymphocyte activation protein 3; PD-1, programmed cell death 1; TIM-3, T-cell immunoglobulin and mucin-domain containing-3.

**Supplementary Table 2**

| Clinical endpoints by RECIST and irRECIST |                |      |                  |      |                      |
|-------------------------------------------|----------------|------|------------------|------|----------------------|
|                                           | RECIST (n=167) |      | irRECIST (n=167) |      | <i>p</i> -value      |
|                                           | n              | %    | n                | %    |                      |
| ORR vs irORR <sup>a</sup>                 | 35             | 21.0 | 38               | 22.8 | 0.51 <sup>b</sup>    |
| 95% CI, %                                 | 15.1 - 27.9    |      | 16.6 - 29.9      |      |                      |
| CR vs irCR                                | 2              | 1.2  | 2                | 1.2  | 0.99 <sup>c</sup>    |
| 95% CI, %                                 | 0.1 - 4.3      |      | 0.1 - 4.3        |      |                      |
| PR vs irPR                                | 33             | 19.8 | 36               | 21.6 | 0.69 <sup>c</sup>    |
| 95% CI, %                                 | 14.0 - 26.6    |      | 15.6 - 28.6      |      |                      |
| SD vs irSD                                | 69             | 41.3 | 84               | 50.3 | 0.1 <sup>c</sup>     |
| 95% CI                                    | 28.1 - 43.1    |      | 42.5 - 58.1      |      |                      |
| PD vs irPD                                | 59             | 35.3 | 41               | 24.6 | 0.03 <sup>c</sup>    |
| 95% CI, %                                 | 28.1 - 43.1    |      | 18.2 - 31.8      |      |                      |
| Not evaluable                             | 4              | 2.4  | 4                | 2.4  |                      |
| months                                    |                |      |                  |      |                      |
| median PFS vs median irPFS                | 3.3            |      | 5.5              |      | < 0.001 <sup>d</sup> |
| 95% CI                                    | 2.6 – 4.2      |      | 4.2 – 8.1        |      |                      |

Abbreviations: CI, confidence interval; CR, complete response; ir, immune-related; ORR, objective response rate; PD, progressive disease; PFS, progression-free survival; PR, partial response; RECIST, response evaluation criteria in solid tumor; SD, stable disease.

<sup>a</sup> CR plus PR per RECISTv1.1 and irCR plus irPR per irRECIST.

<sup>b</sup> Difference between ORR and irORR was estimated using McNemar's test for paired categorical data.

<sup>c</sup> Differences between responses rates evaluated by RECISTv1.1 or irRECIST were estimated using Chi-Square test of equal proportion.

<sup>d</sup> Difference between PFS and irPFS was estimated using Prentice-Wilcoxon test.

**Supplementary Table 3**

| Association of Tumor Cell PD-L1 Expression Levels or Tumor Cell PD-L2 Expression Levels with Fuhrman Nuclear Grade                                                                                                                                                                                                                                                                          |                |      |               |      |                              |  |                |  |               |  |  |
|---------------------------------------------------------------------------------------------------------------------------------------------------------------------------------------------------------------------------------------------------------------------------------------------------------------------------------------------------------------------------------------------|----------------|------|---------------|------|------------------------------|--|----------------|--|---------------|--|--|
| TC PD-L1 Expression <sup>a</sup>                                                                                                                                                                                                                                                                                                                                                            |                |      |               |      |                              |  |                |  |               |  |  |
| <table border="0" style="width:100%; border:none;"> <tr> <td style="width:15%;"></td> <td colspan="2" style="border-top: 1px solid black; border-bottom: 1px solid black; text-align:center;">&lt; 1% (n = 108)</td> <td colspan="2" style="border-top: 1px solid black; border-bottom: 1px solid black; text-align:center;">≥ 1% (n = 17)</td> <td style="width:15%;"></td> </tr> </table> |                |      |               |      |                              |  | < 1% (n = 108) |  | ≥ 1% (n = 17) |  |  |
|                                                                                                                                                                                                                                                                                                                                                                                             | < 1% (n = 108) |      | ≥ 1% (n = 17) |      |                              |  |                |  |               |  |  |
| Grade                                                                                                                                                                                                                                                                                                                                                                                       | n              | %    | n             | %    | <i>p</i> -value <sup>b</sup> |  |                |  |               |  |  |
| 2                                                                                                                                                                                                                                                                                                                                                                                           | 31             | 96.9 | 1             | 3.1  | <0.01                        |  |                |  |               |  |  |
| 3                                                                                                                                                                                                                                                                                                                                                                                           | 58             | 89.2 | 7             | 10.8 |                              |  |                |  |               |  |  |
| 4                                                                                                                                                                                                                                                                                                                                                                                           | 19             | 67.9 | 9             | 32.1 |                              |  |                |  |               |  |  |
| TC PD-L2 Expression <sup>c</sup>                                                                                                                                                                                                                                                                                                                                                            |                |      |               |      |                              |  |                |  |               |  |  |
| <table border="0" style="width:100%; border:none;"> <tr> <td style="width:15%;"></td> <td colspan="2" style="border-top: 1px solid black; border-bottom: 1px solid black; text-align:center;">&lt; 1% (n = 72)</td> <td colspan="2" style="border-top: 1px solid black; border-bottom: 1px solid black; text-align:center;">≥ 1% (n = 43)</td> <td style="width:15%;"></td> </tr> </table>  |                |      |               |      |                              |  | < 1% (n = 72)  |  | ≥ 1% (n = 43) |  |  |
|                                                                                                                                                                                                                                                                                                                                                                                             | < 1% (n = 72)  |      | ≥ 1% (n = 43) |      |                              |  |                |  |               |  |  |
| Grade                                                                                                                                                                                                                                                                                                                                                                                       | n              | %    | n             | %    | <i>p</i> -value <sup>b</sup> |  |                |  |               |  |  |
| 2                                                                                                                                                                                                                                                                                                                                                                                           | 20             | 69.0 | 9             | 31.0 | 0.59                         |  |                |  |               |  |  |
| 3                                                                                                                                                                                                                                                                                                                                                                                           | 35             | 58.3 | 25            | 41.7 |                              |  |                |  |               |  |  |
| 4                                                                                                                                                                                                                                                                                                                                                                                           | 17             | 65.4 | 9             | 34.6 |                              |  |                |  |               |  |  |

Abbreviations: PD-L1/2, programmed cell death ligand 1/2; TC, tumor cell

<sup>a</sup> Expression data or grade status for 42 patients were not available for analysis.

<sup>b</sup> Chi-square test

<sup>c</sup> Expression data or grade status for 52 patients were not available for analysis.

**Supplementary Table 4**

| <b>Summary of Efficacy Results Per Overall PD-L1 Expression Levels at 0.1%, 0.5%, 1% or 5% Cutoffs<sup>a</sup></b> |                              |      |                |      |
|--------------------------------------------------------------------------------------------------------------------|------------------------------|------|----------------|------|
| Endpoints                                                                                                          | <0.1% (n = 55 <sup>b</sup> ) |      | ≥0.1% (n = 76) |      |
|                                                                                                                    | n                            | %    | n              | %    |
| ORR                                                                                                                | 12                           | 22.2 | 15             | 20.6 |
| 95% CI, %                                                                                                          | 12.0 - 35.6                  |      | 12.0 - 31.6    |      |
| irORR                                                                                                              | 12                           | 22.2 | 17             | 22.6 |
| 95% CI, %                                                                                                          | 12.0 - 35.6                  |      | 13.8 - 33.8    |      |
| Median PFS, months                                                                                                 | 2.9                          |      | 3.0            |      |
| 95% CI                                                                                                             | 1.8 - 4.3                    |      | 1.9 - 5.4      |      |
| Median irPFS, months                                                                                               | 5.4                          |      | 5.4            |      |
| 95% CI                                                                                                             | 4.2 - 13.7                   |      | 3.0 - 8.1      |      |
| Endpoints                                                                                                          | <0.5% (n = 75 <sup>b</sup> ) |      | ≥0.5% (n = 56) |      |
|                                                                                                                    | n                            | %    | n              | %    |
| ORR                                                                                                                | 15                           | 20.3 | 12             | 22.6 |
| 95% CI, %                                                                                                          | 11.8 - 31.2                  |      | 12.3 - 36.2    |      |
| irORR                                                                                                              | 15                           | 20.3 | 14             | 25.5 |
| 95% CI, %                                                                                                          | 11.8 - 31.2                  |      | 14.7 - 39.0    |      |
| Median PFS, months                                                                                                 | 2.9                          |      | 4.0            |      |
| 95% CI                                                                                                             | 1.9 - 4.2                    |      | 1.4 - 5.7      |      |
| Median irPFS, months                                                                                               | 4.5                          |      | 5.5            |      |
| 95% CI                                                                                                             | 4.1 - 8.1                    |      | 3.1 - 10.8     |      |
| Endpoints                                                                                                          | <1% (n = 93 <sup>b</sup> )   |      | ≥1% (n = 38)   |      |
|                                                                                                                    | n                            | %    | n              | %    |
| ORR                                                                                                                | 19                           | 20.7 | 8              | 22.9 |
| 95% CI, %                                                                                                          | 12.9 - 30.4                  |      | 10.4 - 40.1    |      |
| irORR                                                                                                              | 20                           | 22.0 | 9              | 23.7 |
| 95% CI, %                                                                                                          | 14.0 - 31.9                  |      | 11.4 - 40.2    |      |
| Median PFS, months                                                                                                 | 3                            |      | 3.0            |      |
| 95% CI                                                                                                             | 2.0 - 4.2                    |      | 1.4 - 6.8      |      |
| Median irPFS, months                                                                                               | 4.5                          |      | 5.7            |      |
| 95% CI                                                                                                             | 4.1 - 8.1                    |      | 2.0 - 15.4     |      |
| Endpoints                                                                                                          | <5% (n = 118 <sup>b</sup> )  |      | ≥5% (n = 13)   |      |
|                                                                                                                    | n                            | %    | n              | %    |
| ORR                                                                                                                | 21                           | 18.3 | 6              | 50.0 |
| 95% CI, %                                                                                                          | 11.7 - 26.6                  |      | 21.1 - 78.9    |      |
| irORR                                                                                                              | 24                           | 20.7 | 5              | 38.5 |
| 95% CI, %                                                                                                          | 13.7 - 29.2                  |      | 13.9 - 68.4    |      |
| Median PFS, months                                                                                                 | 2.9                          |      | 7.6            |      |
| 95% CI                                                                                                             | 2.0 - 4.1                    |      | 1.3 - 39.1     |      |
| Median irPFS, months                                                                                               | 4.4                          |      | 39.1           |      |
| 95% CI                                                                                                             | 4.1 - 7.0                    |      | 1.3 - 39.1     |      |

Abbreviations: CI, confidence interval; ir, immune-related; ORR, objective response rate; PD-L1, programmed death ligand 1; PFS, progression-free survival.

<sup>a</sup> For 36 patients either tissues were not available or stained slides could not be not evaluated by image analysis.

<sup>b</sup> ORR data for 4 patients and irORR data for 2 patients were missing.

**Supplementary Table 5**

| Summary of Efficacy Results Per Tumor Cell PD-L2 Expression Levels at 5%, 10% or 20% Cutoffs <sup>a</sup> |                               |      |                |      |
|-----------------------------------------------------------------------------------------------------------|-------------------------------|------|----------------|------|
| Endpoints                                                                                                 | < 5% (n = 97 <sup>b</sup> )   |      | ≥ 5% (n = 30)  |      |
|                                                                                                           | n                             | %    | n              | %    |
| ORR                                                                                                       | 23                            | 24.7 | 5              | 16.7 |
| 95% CI, %                                                                                                 | 16.4 - 34.8                   |      | 5.6 - 34.7     |      |
| irORR                                                                                                     | 23                            | 24.2 | 7              | 23.3 |
| 95% CI, %                                                                                                 | 16.0 - 34.1                   |      | 9.9 - 42.3     |      |
| Median PFS, months                                                                                        | 3.3                           |      | 2.6            |      |
| 95% CI                                                                                                    | 1.9 - 4.3                     |      | 1.4 - 4.3      |      |
| Median irPFS, months                                                                                      | 5.4                           |      | 4.5            |      |
| 95% CI                                                                                                    | 4.1 - 7.0                     |      | 2.4 - 15.4     |      |
| Endpoints                                                                                                 | < 10% (n = 108 <sup>b</sup> ) |      | ≥ 10% (n = 19) |      |
|                                                                                                           | n                             | %    | n              | %    |
| ORR                                                                                                       | 26                            | 25.0 | 2              | 10.5 |
| 95% CI, %                                                                                                 | 17.0 - 34.4                   |      | 1.3 - 33.1     |      |
| irORR                                                                                                     | 26                            | 24.5 | 4              | 21.1 |
| 95% CI, %                                                                                                 | 16.7 - 33.8                   |      | 6.1 - 45.6     |      |
| Median PFS, months                                                                                        | 3.4                           |      | 2.0            |      |
| 95% CI                                                                                                    | 2.2 - 4.3                     |      | 1.3 - 4.0      |      |
| Median irPFS, months                                                                                      | 5.4                           |      | 8.3            |      |
| 95% CI                                                                                                    | 4.1 - 7.1                     |      | 1.4 - 38.3     |      |
| Endpoints                                                                                                 | < 20% (n = 114 <sup>b</sup> ) |      | ≥ 20% (n = 13) |      |
|                                                                                                           | n                             | %    | n              | %    |
| ORR                                                                                                       | 27                            | 24.6 | 1              | 7.7  |
| 95% CI, %                                                                                                 | 16.8 - 33.7                   |      | 0.2 - 36.0     |      |
| irORR                                                                                                     | 28                            | 25.0 | 2              | 15.4 |
| 95% CI, %                                                                                                 | 17.3 - 34.1                   |      | 1.9 - 45.4     |      |
| Median PFS, months                                                                                        | 3                             |      | 2.1            |      |
| 95% CI                                                                                                    | 2.0 - 4.2                     |      | 1.3 - 4.3      |      |
| Median irPFS, months                                                                                      | 5.4                           |      | 11.0           |      |
| 95% CI                                                                                                    | 3.4 - 7.0                     |      | 1.4 - 38.3     |      |

Abbreviations: CI, confidence interval; ir, immune-related; ORR, objective response rate; PD-L2, programmed cell death ligand 2; PFS, progression-free survival

<sup>a</sup> Expression data were not available for 40 patients.

<sup>b</sup> ORR data for 4 patients and irORR data for 2 patients were missing.

**Supplementary Table 6**

| Summary of Efficacy Results Per Tumor Cell PD-L1 and/or PD-L2 Expression Levels at 1% Cutoff <sup>a</sup> |                            |      |              |      |
|-----------------------------------------------------------------------------------------------------------|----------------------------|------|--------------|------|
| Endpoints                                                                                                 | <1% (n = 71 <sup>b</sup> ) |      | ≥1% (n = 55) |      |
|                                                                                                           | n                          | %    | n            | %    |
| ORR                                                                                                       | 15                         | 22.4 | 13           | 23.6 |
| 95% CI, %                                                                                                 | 13.1 - 34.2                |      | 13.2 - 37.0  |      |
| irORR                                                                                                     | 15                         | 21.7 | 15           | 27.3 |
| 95% CI, %                                                                                                 | 12.7 - 33.3                |      | 16.1 - 41.0  |      |
| Median PFS, months                                                                                        | 3.4                        |      | 2.8          |      |
| 95% CI                                                                                                    | 1.8 - 4.3                  |      | 1.5 - 5.4    |      |
| Median irPFS, months                                                                                      | 5.5                        |      | 5.4          |      |
| 95% CI                                                                                                    | 4.1 - 8.5                  |      | 2.7 - 8.3    |      |

Abbreviations: CI, confidence interval; ir: immune related; ORR, objective response rate; PD-L1, programmed cell death ligand 1; PFS, progression-free survival; TC, tumor cell

<sup>a</sup> Expression data were not available for 41 patients.

<sup>b</sup> ORR data for 4 patients and irORR data for 2 patients were missing.

# Supplementary Table 7

| Descriptive Statistics of the Biomarkers Quantified by Multiplex Immunofluorescence and Correlated with Clinical Outcomes. |                  |         |                |        |                |         |         |                |                    |                      |                      |                  |                          |                        |                        |                          |         |        |
|----------------------------------------------------------------------------------------------------------------------------|------------------|---------|----------------|--------|----------------|---------|---------|----------------|--------------------|----------------------|----------------------|------------------|--------------------------|------------------------|------------------------|--------------------------|---------|--------|
| Biomarkers                                                                                                                 | Number of values | Minimum | 25% Percentile | Median | 75% Percentile | Maximum | Mean    | Std. Deviation | Std. Error of Mean | Lower 95% CI of mean | Upper 95% CI of mean | 95% CI of median | Actual coefficient level | Lower confidence limit | Upper confidence limit | Coefficient of variation | Sum     |        |
| Density of CD8 <sup>+</sup> cells (cells per mm <sup>2</sup> )                                                             | 98               | 49.55   | 108.4          | 177.3  | 712.2          | 7686    | 392     | 823.1          | 83.15              | 427                  | 791.7                |                  | 96.66%                   | 286.7                  | 461.4                  |                          | 136.0%  | 56019  |
| Density of CD8 <sup>+</sup> cells that are PD-1 <sup>+</sup>                                                               | 98               | 1.579   | 88.88          | 217.6  | 494            | 5543    | 413     | 684            | 89.09              | 275.8                | 550.1                |                  | 96.66%                   | 147.5                  | 269.1                  |                          | 165.6%  | 40471  |
| Density of CD8 <sup>+</sup> cells that are TIM-3 <sup>+</sup>                                                              | 98               | 0       | 3.059          | 22.84  | 59.68          | 793.5   | 66.9    | 120            | 12.12              | 42.83                | 90.96                |                  | 96.66%                   | 15.47                  | 29.03                  |                          | 179.41% | 6556   |
| Density of CD8 <sup>+</sup> cells that are LAG-3 <sup>+</sup>                                                              | 98               | 0       | 0              | 1.52   | 10.74          | 321.6   | 22.26   | 58.55          | 5.914              | 10.52                | 33.99                |                  | 96.66%                   | 0.7894                 | 4.342                  |                          | 263.05% | 2181   |
| % of CD8 <sup>+</sup> cells that are PD-1 <sup>+</sup>                                                                     | 98               | 1.307   | 41.72          | 60.01  | 81.29          | 97.59   | 81.01   | 24.35          | 2.46               | 59.13                | 65.9                 |                  | 96.66%                   | 55.81                  | 71.89                  |                          | 36.91%  | 9479   |
| % of CD8 <sup>+</sup> cells that are TIM-3 <sup>+</sup>                                                                    | 98               | 0       | 1.098          | 4.002  | 14.71          | 51.7    | 6.536   | 10.66          | 1.077              | 7.399                | 11.67                |                  | 96.66%                   | 3.877                  | 8.583                  |                          | 111.76% | 934.2  |
| % of CD8 <sup>+</sup> cells that are LAG-3 <sup>+</sup>                                                                    | 98               | 0       | 0              | 0.5849 | 3.173          | 43.08   | 2.853   | 6.034          | 0.4095             | 1.643                | 4.062                |                  | 96.66%                   | 0.2597                 | 1.257                  |                          | 211.5%  | 279.6  |
| Density of CD8 <sup>+</sup> cells that are PD-1 <sup>+</sup> TIM-3 <sup>+</sup> LAG-3 <sup>+</sup>                         | 98               | 6.631   | 49.93          | 106.1  | 188.2          | 662.2   | 131     | 108.6          | 10.97              | 109.2                | 152.8                |                  | 96.66%                   | 81.51                  | 129.1                  |                          | 82.9%   | 12836  |
| Density of CD8 <sup>+</sup> cells that are PD-1 <sup>+</sup> TIM-3 <sup>+</sup> LAG-3 <sup>+</sup>                         | 98               | 0.7894  | 56.09          | 156    | 333.1          | 4451    | 283     | 307.7          | 51.28              | 181.2                | 384.7                |                  | 96.66%                   | 110.1                  | 192.5                  |                          | 179.41% | 27730  |
| Density of CD8 <sup>+</sup> cells that are PD-1 <sup>+</sup> TIM-3 <sup>+</sup> LAG-3 <sup>+</sup>                         | 98               | 0       | 1.568          | 14.22  | 34.89          | 533.3   | 41.17   | 77.04          | 7.782              | 25.72                | 56.61                |                  | 96.66%                   | 8.684                  | 21.48                  |                          | 187.14% | 4026   |
| Density of CD8 <sup>+</sup> cells that are PD-1 <sup>+</sup> TIM-3 <sup>+</sup> LAG-3 <sup>+</sup>                         | 98               | 0       | 0              | 0.5526 | 4.214          | 132.6   | 7.787   | 20.46          | 2.467              | 3.485                | 11.89                |                  | 96.66%                   | 0                      | 1.382                  |                          | 262.76% | 763.1  |
| Density of CD8 <sup>+</sup> cells that are PD-1 <sup>+</sup> TIM-3 <sup>+</sup> LAG-3 <sup>+</sup>                         | 98               | 0       | 0              | 0.3947 | 4.408          | 181.3   | 9.526   | 26.55          | 2.481              | 4.204                | 14.85                |                  | 96.66%                   | 0                      | 0.921                  |                          | 278.67% | 931.5  |
| Density of CD8 <sup>+</sup> cells that are PD-1 <sup>+</sup> TIM-3 <sup>+</sup> LAG-3 <sup>+</sup>                         | 98               | 0       | 0              | 0      | 0              | 8.289   | 0.1663  | 0.8842         | 0.08931            | -0.01992             | 0.3436               |                  | 96.66%                   | 0                      | 0                      |                          | 531.52% | 163.7  |
| Density of CD8 <sup>+</sup> cells that are PD-1 <sup>+</sup> TIM-3 <sup>+</sup> LAG-3 <sup>+</sup>                         | 98               | 0       | 0              | 0.9331 | 2.763          | 21.66   | 2.538   | 4.079          | 0.412              | 1.72                 | 3.356                |                  | 96.66%                   | 0.4685                 | 1.668                  |                          | 160.7%  | 248.7  |
| Density of CD8 <sup>+</sup> cells that are PD-1 <sup>+</sup> TIM-3 <sup>+</sup> LAG-3 <sup>+</sup>                         | 98               | 0       | 0              | 0      | 0.5526         | 31.5    | 1.029   | 3.651          | 0.3688             | 0.2963               | 1.761                |                  | 96.66%                   | 0                      | 0                      |                          | 355.01% | 100.8  |
| % of CD8 <sup>+</sup> cells that are PD-1 <sup>+</sup> TIM-3 <sup>+</sup> LAG-3 <sup>+</sup>                               | 98               | 2.162   | 17.91          | 33.06  | 56.31          | 98.69   | 38.03   | 24.08          | 2.432              | 31.21                | 42.86                |                  | 96.66%                   | 25.94                  | 42.43                  |                          | 63.31%  | 1727   |
| % of CD8 <sup>+</sup> cells that are PD-1 <sup>+</sup> TIM-3 <sup>+</sup> LAG-3 <sup>+</sup>                               | 98               | 1.307   | 35.54          | 51.94  | 65.98          | 91.64   | 51.1    | 20.99          | 2.12               | 46.89                | 55.31                |                  | 96.66%                   | 46.88                  | 56.57                  |                          | 41.07%  | 5088   |
| % of CD8 <sup>+</sup> cells that are PD-1 <sup>+</sup> TIM-3 <sup>+</sup> LAG-3 <sup>+</sup>                               | 98               | 0       | 0.9151         | 1.466  | 11.36          | 43.59   | 7.27    | 8.388          | 0.8442             | 5.594                | 9.966                |                  | 96.66%                   | 2.099                  | 4.261                  |                          | 114.96% | 712.9  |
| % of CD8 <sup>+</sup> cells that are PD-1 <sup>+</sup> TIM-3 <sup>+</sup> LAG-3 <sup>+</sup>                               | 98               | 0       | 0              | 0.2593 | 1.229          | 11.29   | 1.142   | 2.221          | 0.2344             | 0.6964               | 1.587                |                  | 96.66%                   | 0                      | 0.4237                 |                          | 194.54% | 111.6  |
| % of CD8 <sup>+</sup> cells that are PD-1 <sup>+</sup> TIM-3 <sup>+</sup> LAG-3 <sup>+</sup>                               | 98               | 0       | 0              | 0.1493 | 1.356          | 33.42   | 1.501   | 3.973          | 0.4013             | 0.704                | 2.297                |                  | 96.66%                   | 0                      | 0.2892                 |                          | 264.77% | 147.1  |
| % of CD8 <sup>+</sup> cells that are PD-1 <sup>+</sup> TIM-3 <sup>+</sup> LAG-3 <sup>+</sup>                               | 98               | 0       | 0              | 0      | 0              | 1.237   | 0.02336 | 0.1301         | 0.01314            | -0.002714            | 0.04944              |                  | 96.66%                   | 0                      | 0                      |                          | 556.72% | 2.29   |
| % of CD8 <sup>+</sup> cells that are PD-1 <sup>+</sup> TIM-3 <sup>+</sup> LAG-3 <sup>+</sup>                               | 98               | 0       | 0              | 0.2328 | 0.8163         | 8.75    | 0.7421  | 1.31           | 0.1323             | 0.4795               | 1.005                |                  | 96.66%                   | 0.124                  | 0.442                  |                          | 176.48% | 73.72  |
| % of CD8 <sup>+</sup> cells that are PD-1 <sup>+</sup> TIM-3 <sup>+</sup> LAG-3 <sup>+</sup>                               | 98               | 0       | 0              | 0      | 0.1085         | 2.25    | 0.1871  | 0.5101         | 0.05153            | 0.08483              | 0.2094               |                  | 96.66%                   | 0                      | 0                      |                          | 272.67% | 18.33  |
| Density of CD8 <sup>+</sup> cells that are PD-1 <sup>+</sup> TIM-3 <sup>+</sup>                                            | 98               | 0       | 1.842          | 15.79  | 44.9           | 714.5   | 59.69   | 99.27          | 10.63              | 30.79                | 70.6                 |                  | 96.66%                   | 9.868                  | 22.1                   |                          | 195.82% | 4968   |
| Density of CD8 <sup>+</sup> cells that are PD-1 <sup>+</sup> TIM-3 <sup>+</sup>                                            | 98               | 0       | 0              | 1.071  | 8.832          | 267.5   | 17.31   | 44.94          | 4.54               | 8.303                | 26.32                |                  | 96.66%                   | 0.4605                 | 2.368                  |                          | 259.58% | 1697   |
| Density of CD8 <sup>+</sup> cells that are PD-1 <sup>+</sup> TIM-3 <sup>+</sup> and/or LAG-3 <sup>+</sup>                  | 98               | 0       | 2.187          | 17.82  | 51.85          | 800.7   | 58.48   | 114.7          | 11.59              | 35.48                | 81.48                |                  | 96.66%                   | 12.24                  | 24.87                  |                          | 196.14% | 5731   |
| % of CD8 <sup>+</sup> cells that are PD-1 <sup>+</sup> TIM-3 <sup>+</sup>                                                  | 98               | 0       | 0.9382         | 1.837  | 14.13          | 51.7    | 8.771   | 16.32          | 1.643              | 6.701                | 16.84                |                  | 96.66%                   | 2.273                  | 7.411                  |                          | 117.71% | 1695.9 |
| % of CD8 <sup>+</sup> cells that are PD-1 <sup>+</sup> TIM-3 <sup>+</sup>                                                  | 98               | 0       | 0              | 0.5259 | 2.863          | 42.82   | 2.642   | 5.735          | 0.5793             | 1.492                | 3.792                |                  | 96.66%                   | 0.2494                 | 0.96                   |                          | 217.05% | 238.0  |
| % of CD8 <sup>+</sup> cells that are PD-1 <sup>+</sup> TIM-3 <sup>+</sup> and/or LAG-3 <sup>+</sup>                        | 98               | 0       | 1.576          | 6.079  | 15.35          | 61.1    | 9.912   | 11.49          | 1.161              | 7.608                | 12.22                |                  | 96.66%                   | 2.761                  | 8.437                  |                          | 115.94% | 971.4  |
| % of CD8 <sup>+</sup> PD-1 <sup>+</sup> cells that are TIM-3 <sup>+</sup> LAG-3 <sup>+</sup>                               | 98               | 33.71   | 79.53          | 90.3   | 96.78          | 100     | 83.82   | 14.89          | 1.504              | 82.83                | 88.8                 |                  | 96.66%                   | 88                     | 94.09                  |                          | 17.35%  | 8410   |
| % of CD8 <sup>+</sup> PD-1 <sup>+</sup> cells that are TIM-3 <sup>+</sup>                                                  | 98               | 0       | 2.56           | 14.403 | 18.25          | 96.7    | 12.47   | 13.43          | 1.307              | 9.773                | 15.16                |                  | 96.66%                   | 5.263                  | 10.9                   |                          | 107.74% | 1223   |
| % of CD8 <sup>+</sup> PD-1 <sup>+</sup> cells that are TIM-3 <sup>+</sup>                                                  | 98               | 0       | 0              | 0.8514 | 3.882          | 46.46   | 3.755   | 7.17           | 0.7445             | 2.278                | 5.233                |                  | 96.66%                   | 1.724                  | 196.26%                |                          | 368     |        |
| % of CD8 <sup>+</sup> PD-1 <sup>+</sup> cells that are TIM-3 <sup>+</sup> and/or LAG-3 <sup>+</sup>                        | 98               | 0       | 1.215          | 9.698  | 20.47          | 66.29   | 14.18   | 14.89          | 1.504              | 11.2                 | 17.17                |                  | 96.66%                   | 5.915                  | 12                     |                          | 105.00% | 1390   |

Abbreviations: CD8, cluster of differentiation 8; CI, confidence interval; LAG-3, lymphocyte activation protein 3; PD-1, programmed cell death 1; Std., standard; TIM-3/TM-3T cell immunoglobulin and mucin domain containing-3

**Supplementary Table 8**

| Biomarkers with Significant Linear Relationship with irPFS                                       |                                   |                    |                 |
|--------------------------------------------------------------------------------------------------|-----------------------------------|--------------------|-----------------|
| Biomarker                                                                                        | Coefficient $\pm$ SE <sup>a</sup> | irPFS HR (95% CI)  | <i>p</i> -value |
| % of CD8 <sup>+</sup> TIC that are PD-1 <sup>+</sup> TIM-3 <sup>-</sup> LAG-3 <sup>-</sup>       | -0.54 $\pm$ 0.20                  | 0.58 (0.40 - 0.87) | 0.007           |
| density of CD8 <sup>+</sup> TIC that are PD-1 <sup>+</sup> TIM-3 <sup>-</sup> LAG-3 <sup>-</sup> | -0.13 $\pm$ 0.07                  | 0.87 (0.77 - 0.99) | 0.039           |
| % of CD8 <sup>+</sup> TIC that are PD-1 <sup>+</sup>                                             | -0.48 $\pm$ 0.18                  | 0.62 (0.43 - 0.89) | 0.009           |

Abbreviations: CD8, cluster of differentiation 8; CI, confidence interval; LAG-3, lymphocyte activation protein 3; irPFS, immune-related progression free survival; HR, hazard ratio; PD-1, programmed cell death 1; SE, standard error 2; TIM-3, T-cell immunoglobulin and mucin-domain containing-3; TIC, tumor infiltrating cell  
<sup>a</sup>Coefficient  $\pm$  SE have been calculated after cube root transformation of biomarker expression level values.



**Supplementary Table 9**

| Summary of Efficacy Results According Density Levels of CD8 <sup>+</sup> Tumor Infiltrating Cell that are PD-1 <sup>+</sup> TIM-3 <sup>-</sup> LAG-3 <sup>-</sup> and Percentage Levels of CD8 <sup>+</sup> Tumor Infiltrating Cell that are PD-1 <sup>+</sup> <sup>a</sup> |                                                                                                  |      |                             |      |                              |
|-----------------------------------------------------------------------------------------------------------------------------------------------------------------------------------------------------------------------------------------------------------------------------|--------------------------------------------------------------------------------------------------|------|-----------------------------|------|------------------------------|
| Endpoints                                                                                                                                                                                                                                                                   | density of CD8 <sup>+</sup> TIC that are PD-1 <sup>+</sup> TIM-3 <sup>-</sup> LAG-3 <sup>-</sup> |      |                             |      | <i>p</i> -value <sup>d</sup> |
|                                                                                                                                                                                                                                                                             | low (n = 56 <sup>b</sup> )                                                                       |      | high (n = 42 <sup>c</sup> ) |      |                              |
|                                                                                                                                                                                                                                                                             | n                                                                                                | %    | n                           | %    |                              |
| irORR                                                                                                                                                                                                                                                                       | 7                                                                                                | 12.7 | 14                          | 34.2 | 0.01                         |
| 95% CI, %                                                                                                                                                                                                                                                                   | 5.3 - 24.5                                                                                       |      | 20.1 - 50.6                 |      |                              |
| Median irPFS, months                                                                                                                                                                                                                                                        | 4.2                                                                                              |      | 7.0                         |      | 0.05                         |
| 95% CI                                                                                                                                                                                                                                                                      | 1.8 - 7.0                                                                                        |      | 4.2 - 15.4                  |      |                              |
| Endpoints                                                                                                                                                                                                                                                                   | % of CD8 <sup>+</sup> TIC that are PD-1 <sup>+</sup>                                             |      |                             |      | <i>p</i> -value <sup>c</sup> |
|                                                                                                                                                                                                                                                                             | low (n = 15 <sup>b</sup> )                                                                       |      | high (n = 83 <sup>c</sup> ) |      |                              |
|                                                                                                                                                                                                                                                                             | n                                                                                                | %    | n                           | %    |                              |
| irORR                                                                                                                                                                                                                                                                       | 0                                                                                                | 0    | 21                          | 25.6 | 0.02                         |
| 95% CI, %                                                                                                                                                                                                                                                                   | 0.0 - 23.2                                                                                       |      | 16.6 - 36.4                 |      |                              |
| Median irPFS, months                                                                                                                                                                                                                                                        | 2.3                                                                                              |      | 7.0                         |      | < 0.01                       |
| 95% CI                                                                                                                                                                                                                                                                      | 1.2 - 4.3                                                                                        |      | 4.2 - 11.0                  |      |                              |

Abbreviations: CD8, cluster of differentiation 8; CI, confidence interval; LAG-3, lymphocyte activation protein 3; ir, immune-related; ORR, objective response rate; PD-1, programmed cell death 1; PFS, progression-free survival; TIC, tumor infiltrating cell; TIM-3, T-cell immunoglobulin and mucin-domain containing-3.

<sup>a</sup> Expression data were not available for 69 patients.

<sup>b</sup> irORR data for 1 patient was missing.

<sup>c</sup> irORR data for 1 patient was missing.

<sup>d</sup> Fisher's exact test was used to test the association with irORR and log-rank test was used to test the association with irPFS.
