# Supplementary material
Source: PubMed Central journal article supplement (PMC6445699)
Supplement: NIHMS1519472-supplement-3.pdf [file NIHMS1519472-supplement-3.pdf]

## Supplementary Figures

**Supplementary Fig. 1**

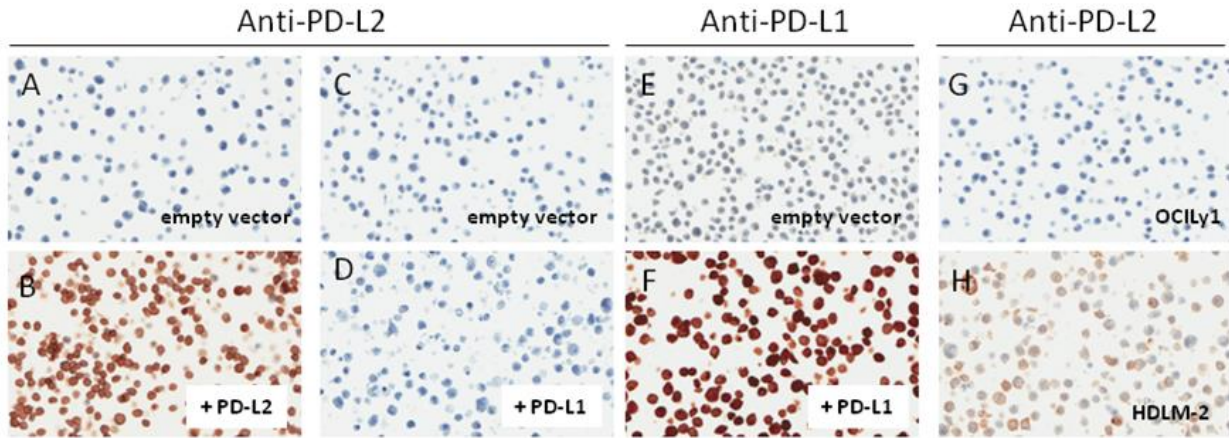

**Validation of PD-L2 IHC Assay.** Sections of paraffin-embedded 300-19 murine cell line transfected with empty vector (A, C, E) or with vectors coding human PD-L2 (B) or human PD-L1 (D, F) were immunostained with a rabbit monoclonal anti-PD-L2 antibody (clone D7U8C) (A, C, B, D) or a with a mouse monoclonal anti-PD-L1 antibody (clone 9A11) (E, F). Immunoreactivity with the anti-PL2 antibody was detected in PD-L2 transfected 300-19 cells (B) but not in PD-L1 transfected 300-19 cells (D). IHC against PD-L1 confirmed the presence of PD-L1 in PD-L1 transected cells (F). No immunoreactivity for PD-L1 or PD-L2 was detected in cells transfected with empty vectors (A, C, E). Immunoreactivity for endogenous PD-L2 was detected in the Hodgkin lymphoma cell line HDLM-2 cell line harboring an amplification of the PD-L1/PL-L2 locus (H) while no reactivity was detected in the diffuse large B cell lymphoma OCILy1 cell line known not to express PD-L2 (G) (1).

**Supplementary Fig. 2**

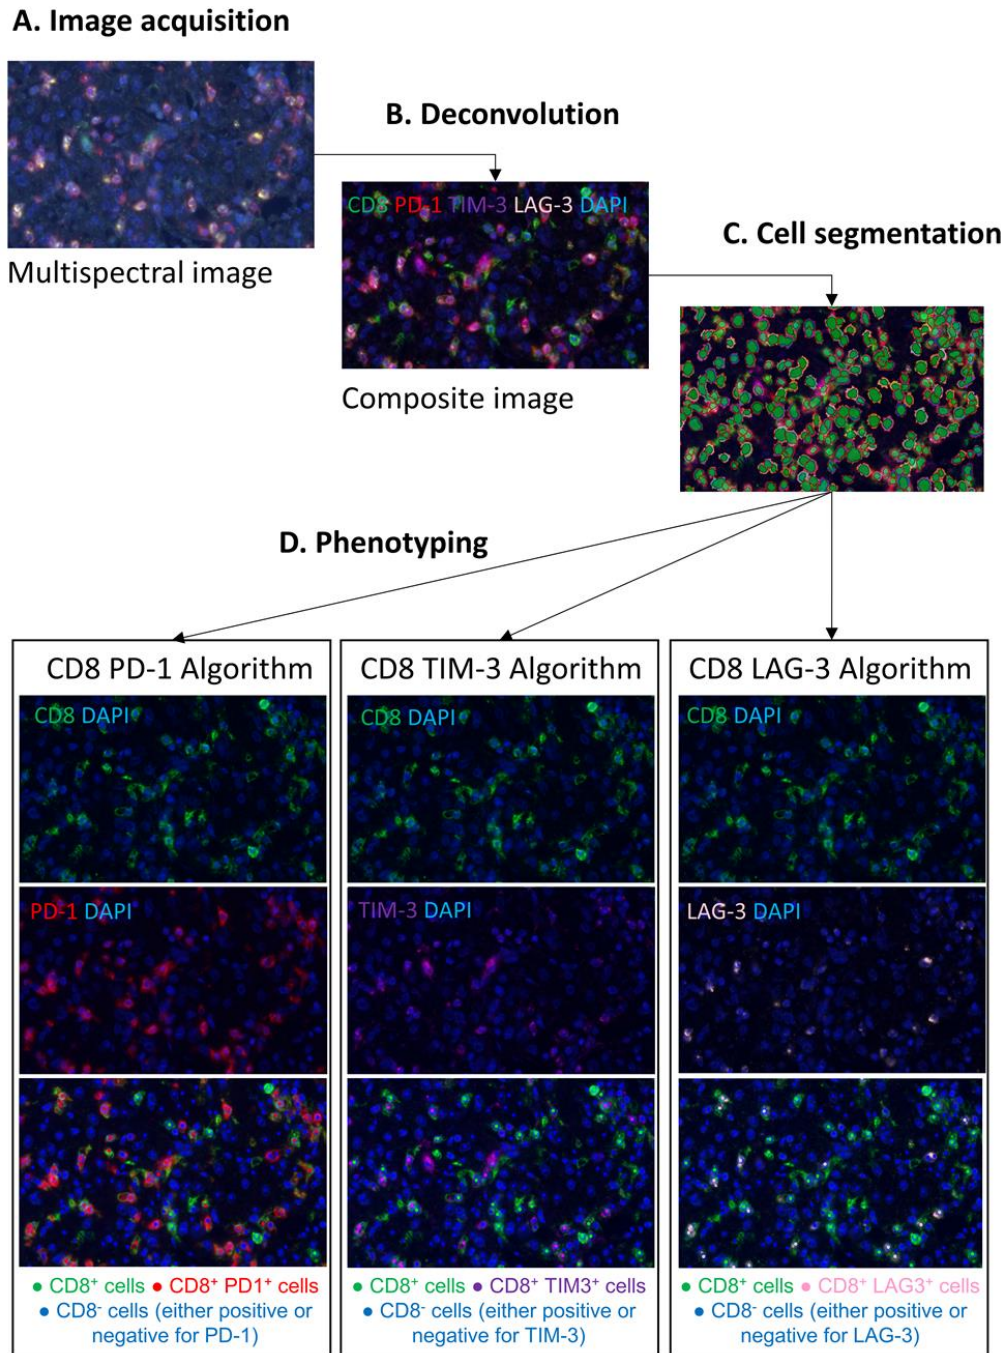

**Workflow of Multiplex IF Image Analysis for the Expression of PD-1, TIM-3 and LAG-3 on CD8<sup>+</sup> Cells Using the Inform 2.2 Software.**

Multispectral images (A) were deconvoluted (B), and cell segmentation (C) was then performed. Phenotyping (D) was performed by developing 3 algorithms recognizing cells mono-stained for CD8 or co-stained for CD8 and PD-1 (left panels); cells mono-stained for CD8 or co-stained for CD8 and TIM-3 (middle panels); cells mono-stained for CD8 or co-stained for CD8 and LAG-3 (right panels). A cell was called CD8<sup>+</sup> only if it was recognized as CD8<sup>+</sup> by all three different algorithms. For each segmented cell, information about the presence or the absence of CD8, PD-1, TIM3 or LAG3 staining was obtained and recorded.

## Supplementary Fig. 3

CONSORT Flow Diagram of Patient Samples

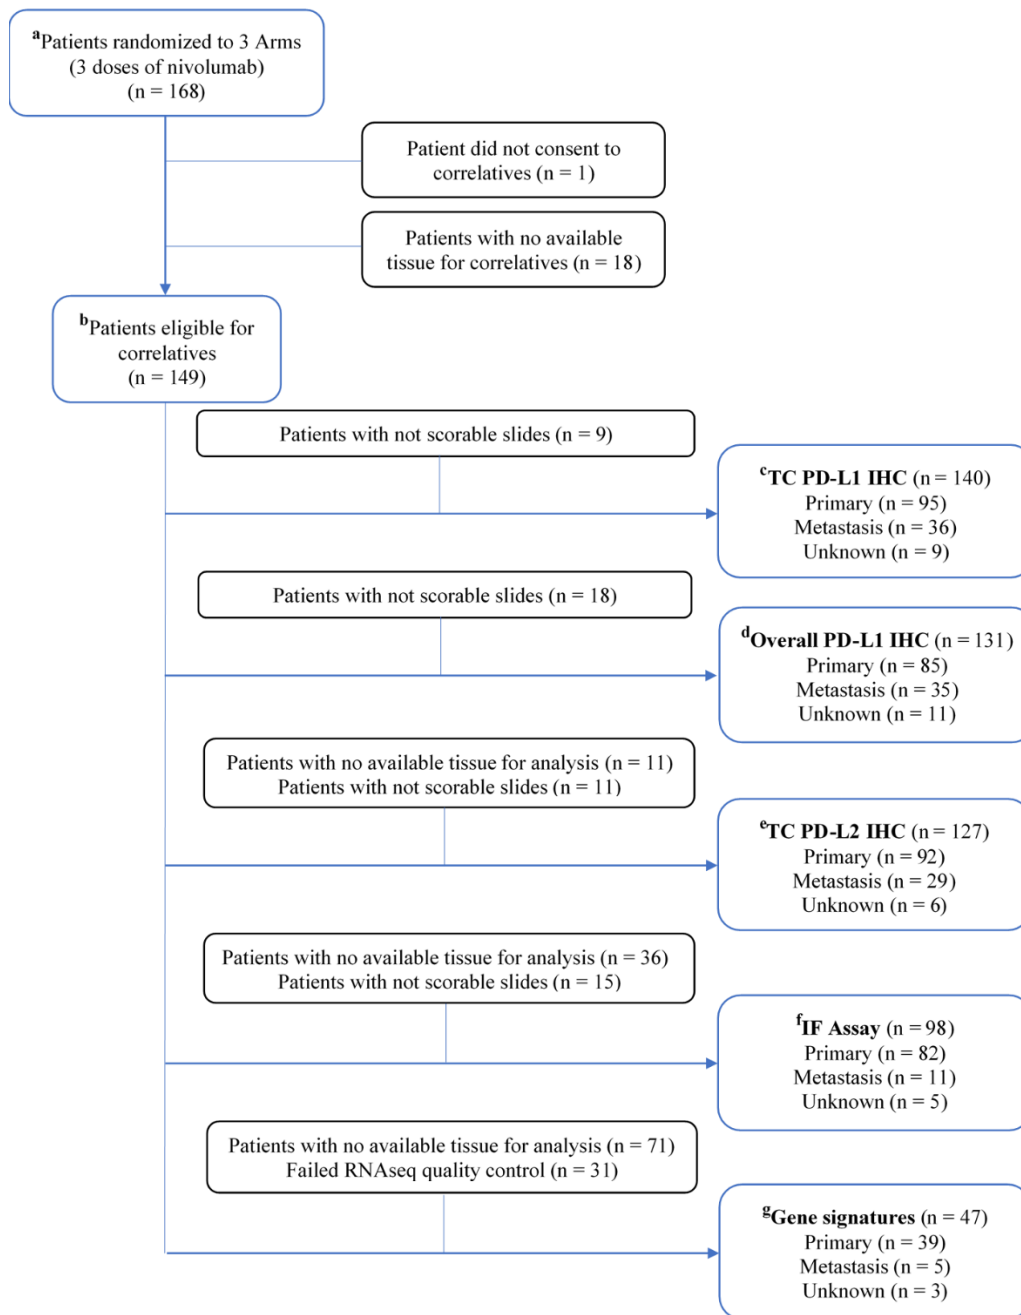

*\*a,b,c,d,e,f,g: No statistically significant difference in Chi square test of equal proportion of treatment dose arms (minimum p-value was 0.656).*

*\*\*Differences in clinical endpoints (ORR & irORR and PFS & irPFS) between patients with missing vs non-missing biomarker measures were assessed for the major and minor node and edges (i.e. a vs b – g, and b vs c – g). The minimum, unadjusted p-value for all combinations of comparisons was 0.166 suggesting no systematic difference in clinical endpoints between cases with and without biomarker measures.*

**Supplementary Fig. 4**

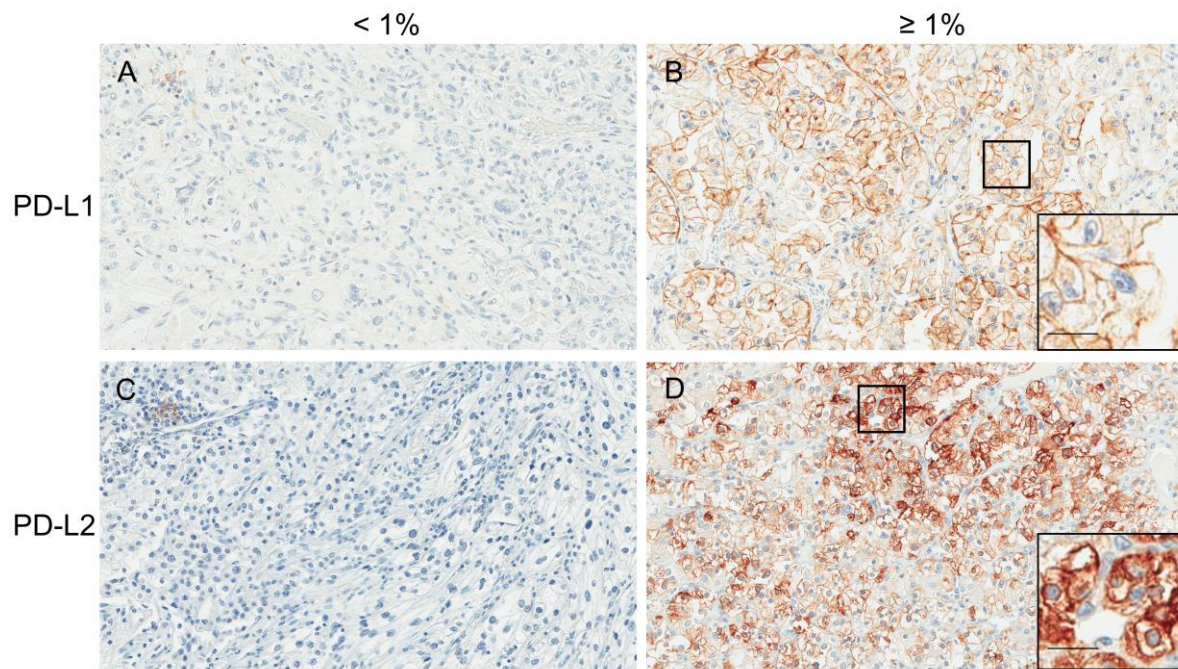

**Representative Images of ccRCC Tissue Sections Immunostained for PD-L1 (A, B) or PD-L2 Expression (C, D) from Patients with Positive Tumor Cells <1% (A, C) or ≥ 1% (B, D). Inset show higher magnification of the selected area (scale bar = 20 μm).**

**Supplementary Fig. 5**

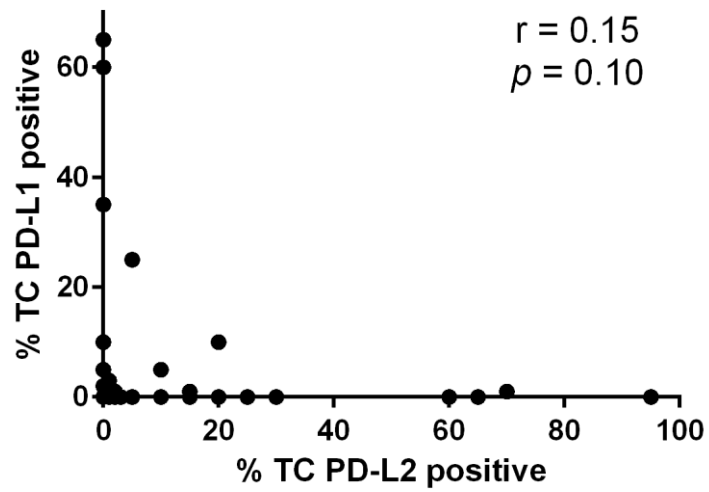

**Scatter Plot of the Percentage of Tumor Cells Expressing PD-L1 versus the Percentage of Tumor Cells Expressing PD-L2.**

Supplementary Fig. 6

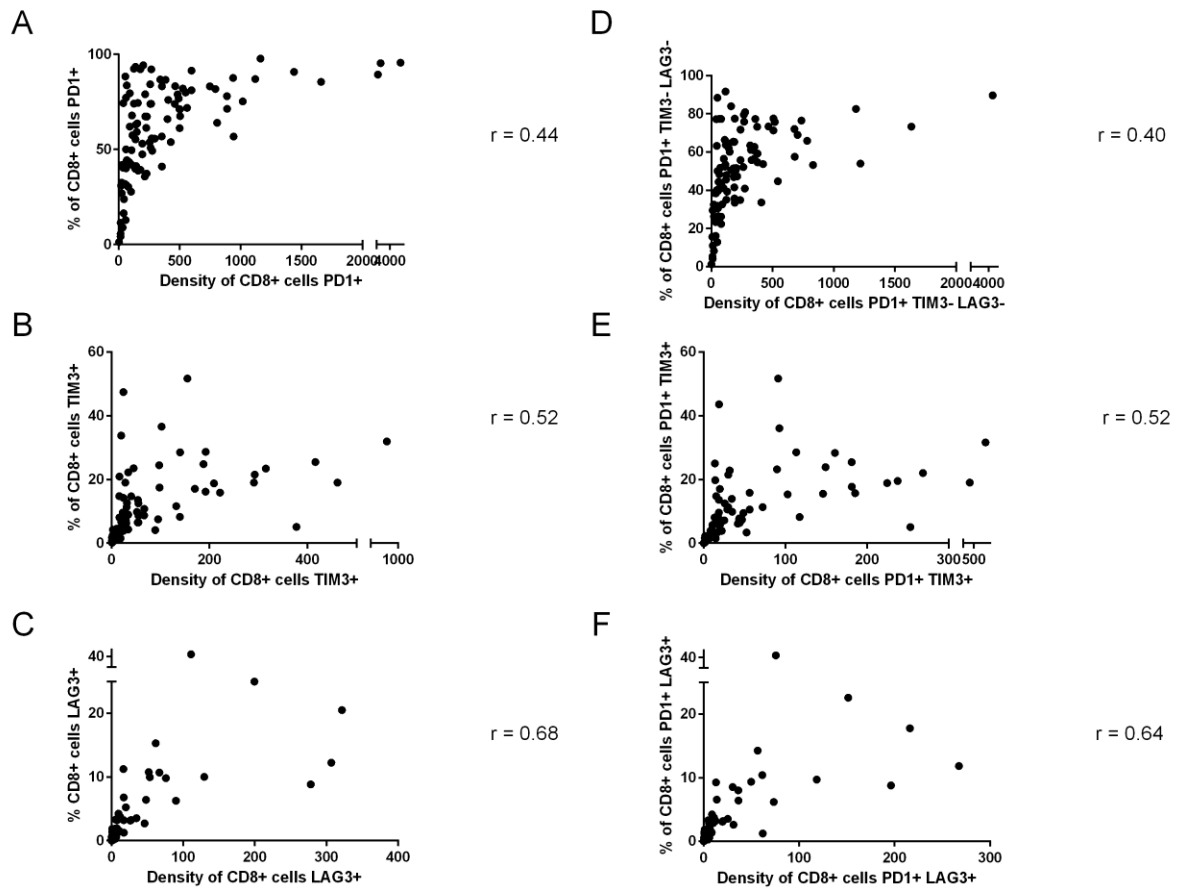

Scatter Plot of the Percentage versus Density of CD8<sup>+</sup> Tumor Infiltrating Cells Expressing PD-1, TIM-3 or LAG-3 either Alone (A, B, C) or in Different Combinations (D, E, F).

## Reference Supplementary Figures

1. Green MR, Monti S, Rodig SJ, Juszczynski P, Currie T, O'Donnell E, et al. Integrative analysis reveals selective 9p24.1 amplification, increased PD-1 ligand expression, and further induction via JAK2 in nodular sclerosing Hodgkin lymphoma and primary mediastinal large B-cell lymphoma. *Blood*. 2010 Oct 28;116(17):3268-77.
